# Supplementary material for: Implication of SPARC in the modulation of the extracellular matrix and mitochondrial function in muscle cells
Source: PubMed Central journal article supplement (PMC5805355; doi:10.1371/journal.pone.0192714), 2018-02-08

S1 Fig

(a) ECM proteins  
for Figure 1

SM 0 1 2 3 4

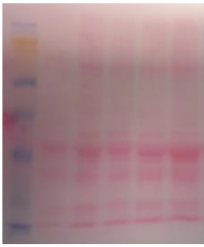

(b) OXPHOS proteins  
for Figure 2

SM 0 1 2 3 4

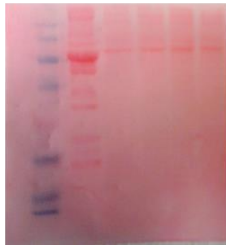

(c) Myogenin & ECM  
proteins for Figure 4 &5

SM 0 1 2 3 4

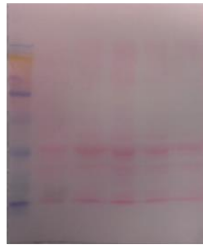

(d) OXPHOS proteins  
for Figure 6

SM 0 1 2 3 4

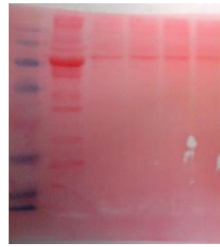

(e) ECM proteins  
for Figure 7

SM 0 1 2 3 4

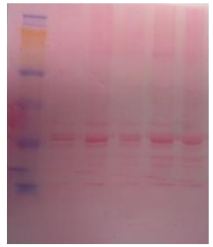

Supplement: pone.0192714.s001.pdf [file pone.0192714.s001.pdf]
