# Supplementary material for: Implication of SPARC in the modulation of the extracellular matrix and mitochondrial function in muscle cells
Source: PubMed Central journal article supplement (PMC5805355; doi:10.1371/journal.pone.0192714), 2018-02-08
Supplement: pone.0192714.s002.pdf [file pone.0192714.s002.pdf]

S2 Fig

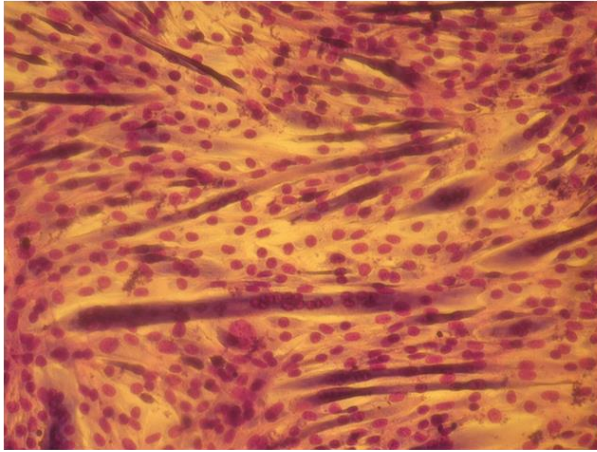

**PBS**

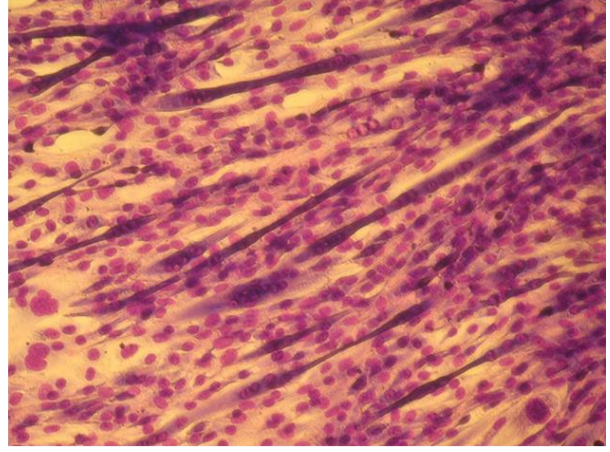

**rSPARC**

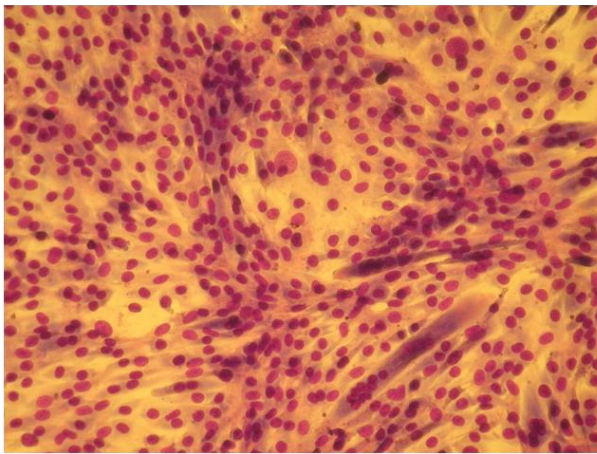

**Anti-SPARC**

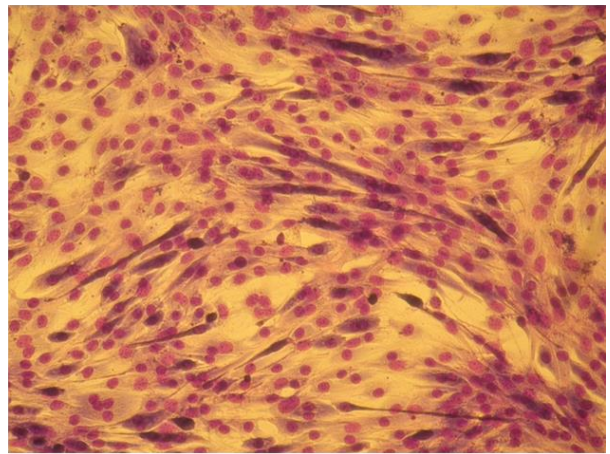

**Anti-SPARC + rSPARC**
