# Supplementary material for: Implication of SPARC in the modulation of the extracellular matrix and mitochondrial function in muscle cells
Source: PubMed Central journal article supplement (PMC5805355; doi:10.1371/journal.pone.0192714), 2018-02-08
Supplement: pone.0192714.s003.pdf [file pone.0192714.s003.pdf]

S1 Table

| Name                  | Protein<br>( $\mu$ g) | SDS gel<br>(%) | Transfer |     | Blocking<br>(h) | 1 <sup>st</sup> AB (Cat#) |     | 2 <sup>nd</sup> AB (Cat#)<br>(h) | Note                          |
|-----------------------|-----------------------|----------------|----------|-----|-----------------|---------------------------|-----|----------------------------------|-------------------------------|
|                       |                       |                | (V)      | (h) |                 | (Dilution)                | (h) |                                  |                               |
| Collagen 1a1          | 30                    | 7              | 90       | 5   | 1               | sc-8784-R                 |     | sc-2004                          | -                             |
|                       |                       |                |          |     |                 | (1/200)                   | ON  | 1                                |                               |
| Fibronectin           | 5                     | 7              | 90       | 5   | 1               | sc-8422                   |     | sc-2005                          | -                             |
|                       |                       |                |          |     |                 | (1/800)                   | ON  | 1                                |                               |
| Myogenin              | 5                     | 12             | 75       | 2   | 1               | sc-12732                  |     | sc-2005                          | -                             |
|                       |                       |                |          |     |                 | (1/400)                   | ON  | 1                                |                               |
| Mitochondria (OXPHOS) | 30                    | 12             | 75       | 3   | ON              | ab-110413                 |     | 88-8887-31                       | Transfer buffer<br>is 1X CAPS |
|                       |                       |                |          |     |                 | (1/200)                   | 2   | 2                                |                               |
